# Supplementary material for: Cost-utility and cost consequence of a telehealth intervention targeting improvement in addictive eating for Australian adults (the TRACE program)
Source: PubMed Central journal article supplement — J Public Health (Oxf). 2024 Oct 5;46(4):564–74. doi: 10.1093/pubmed/fdae273 (PMC11638481; doi:10.1093/pubmed/fdae273), 2024-10-05
Supplement: burrows_supplementary_material_fdae273.pdf [file burrows_supplementary_material_fdae273.pdf]

## **Supplementary material**

**Title:** Cost-utility and cost consequence of a telehealth intervention targeting improvement in addictive eating for Australian adults (the TRACE program)

**Authors:** Janelle A Skinner<sup>1,2</sup>, Mark Leary<sup>1,2</sup>, Olivia Wynne<sup>2</sup>, Phillipa J Hay<sup>3,4</sup>, Clare E Collins<sup>1,2</sup>, Tracy L Burrows<sup>1,2\*</sup>

### **Author affiliations:**

<sup>1</sup>School of Health Sciences, College of Health, Medicine and Wellbeing, University of Newcastle, Callaghan NSW 2308, Australia

<sup>2</sup>Hunter Medical Research Institute, University of Newcastle, New Lambton Heights, NSW, 2305, Australia

<sup>3</sup>Translational Health Research Institute, Western Sydney University, Campbelltown, NSW, 2751, Australia

<sup>4</sup>Mental Health Services, Camden and Campbelltown Hospitals, SWSLHD, Campbelltown, NSW, 2751, Australia

**\*Corresponding Author:** Professor Tracy Burrows. Mailing address: School of Health Sciences, University Drive, University of Newcastle, Callaghan, NSW, Australia, 2308. Ph: +610249215514. Email: [tracy.burrows@newcastle.edu.au](mailto:tracy.burrows@newcastle.edu.au)

## CHEERS 2022 Checklist

| Topic                                | No. | Item                                                                                                                            | Location where item is reported                                     |
|--------------------------------------|-----|---------------------------------------------------------------------------------------------------------------------------------|---------------------------------------------------------------------|
| <b>Title</b>                         |     |                                                                                                                                 |                                                                     |
|                                      | 1   | Identify the study as an economic evaluation and specify the interventions being compared.                                      | Page 1                                                              |
| <b>Abstract</b>                      |     |                                                                                                                                 |                                                                     |
|                                      | 2   | Provide a structured summary that highlights context, key methods, results, and alternative analyses.                           | Page 2                                                              |
| <b>Introduction</b>                  |     |                                                                                                                                 |                                                                     |
| <b>Background and objectives</b>     | 3   | Give the context for the study, the study question, and its practical relevance for decision making in policy or practice.      | Lines 26 - 58                                                       |
| <b>Methods</b>                       |     |                                                                                                                                 |                                                                     |
| <b>Health economic analysis plan</b> | 4   | Indicate whether a health economic analysis plan was developed and where available.                                             | Line 64; Protocol paper (Ref 9)                                     |
| <b>Study population</b>              | 5   | Describe characteristics of the study population (such as age range, demographics, socioeconomic, or clinical characteristics). | Lines 72 - 77; Table 1                                              |
| <b>Setting and location</b>          | 6   | Provide relevant contextual information that may influence findings.                                                            | Lines 63 - 64; Protocol paper (Ref 9); Main outcomes paper (Ref 10) |
| <b>Comparators</b>                   | 7   | Describe the interventions or strategies being compared and why chosen.                                                         | Lines 79 - 89; Protocol paper (Ref 9)                               |
| <b>Perspective</b>                   | 8   | State the perspective(s) adopted by the study and why chosen.                                                                   | Lines 56 -58                                                        |
| <b>Time horizon</b>                  | 9   | State the time horizon for the study and why appropriate.                                                                       | Lines 92 - 93                                                       |
| <b>Discount rate</b>                 | 10  | Report the discount rate(s) and reason chosen.                                                                                  | Lines 151 - 152                                                     |
| <b>Selection of outcomes</b>         | 11  | Describe what outcomes were used as the measure(s) of benefit(s) and harm(s).                                                   | Lines 96 - 103                                                      |

| <b>Topic</b>                                                                 | <b>No.</b> | <b>Item</b>                                                                                                                                                                   | <b>Location where item is reported</b> |
|------------------------------------------------------------------------------|------------|-------------------------------------------------------------------------------------------------------------------------------------------------------------------------------|----------------------------------------|
| <b>Measurement of outcomes</b>                                               | 12         | Describe how outcomes used to capture benefit(s) and harm(s) were measured.                                                                                                   | Lines 104 - 126                        |
| <b>Valuation of outcomes</b>                                                 | 13         | Describe the population and methods used to measure and value outcomes.                                                                                                       | Lines 98 – 100,<br>104 - 115           |
| <b>Measurement and valuation of resources and costs</b>                      | 14         | Describe how costs were valued.                                                                                                                                               | Lines 128 -142                         |
| <b>Currency, price date, and conversion</b>                                  | 15         | Report the dates of the estimated resource quantities and unit costs, plus the currency and year of conversion.                                                               | Lines 144 - 152                        |
| <b>Rationale and description of model</b>                                    | 16         | If modelling is used, describe in detail and why used. Report if the model is publicly available and where it can be accessed.                                                | NA                                     |
| <b>Analytics and assumptions</b>                                             | 17         | Describe any methods for analysing or statistically transforming data, any extrapolation methods, and approaches for validating any model used.                               | Lines 154 - 188                        |
| <b>Characterising heterogeneity</b>                                          | 18         | Describe any methods used for estimating how the results of the study vary for subgroups.                                                                                     | NA                                     |
| <b>Characterising distributional effects</b>                                 | 19         | Describe how impacts are distributed across different individuals or adjustments made to reflect priority populations.                                                        | Lines 160 - 172                        |
| <b>Characterising uncertainty</b>                                            | 20         | Describe methods to characterise any sources of uncertainty in the analysis.                                                                                                  | Lines 185 - 188                        |
| <b>Approach to engagement with patients and others affected by the study</b> | 21         | Describe any approaches to engage patients or service recipients, the general public, communities, or stakeholders (such as clinicians or payers) in the design of the study. | Protocol paper<br>(Ref 9)              |
| <b>Results</b>                                                               |            |                                                                                                                                                                               |                                        |
| <b>Study parameters</b>                                                      | 22         | Report all analytic inputs (such as values, ranges, references) including uncertainty or distributional assumptions.                                                          | Lines 195 - 198                        |
| <b>Summary of main results</b>                                               | 23         | Report the mean values for the main categories of costs and outcomes of interest and summarise them in the most appropriate overall measure.                                  | Lines 200 - 207                        |

| Topic                                                                       | No. | Item                                                                                                                                                                     | Location where item is reported |
|-----------------------------------------------------------------------------|-----|--------------------------------------------------------------------------------------------------------------------------------------------------------------------------|---------------------------------|
| <b>Effect of uncertainty</b>                                                | 24  | Describe how uncertainty about analytic judgments, inputs, or projections affect findings. Report the effect of choice of discount rate and time horizon, if applicable. | Lines 241 - 246                 |
| <b>Effect of engagement with patients and others affected by the study</b>  | 25  | Report on any difference patient/service recipient, general public, community, or stakeholder involvement made to the approach or findings of the study                  | NA                              |
| <b>Discussion</b>                                                           |     |                                                                                                                                                                          |                                 |
| <b>Study findings, limitations, generalisability, and current knowledge</b> | 26  | Report key findings, limitations, ethical or equity considerations not captured, and how these could affect patients, policy, or practice.                               | Lines 248 - 375                 |
| <b>Other relevant information</b>                                           |     |                                                                                                                                                                          |                                 |
| <b>Source of funding</b>                                                    | 27  | Describe how the study was funded and any role of the funder in the identification, design, conduct, and reporting of the analysis                                       | Lines 392 - 395                 |
| <b>Conflicts of interest</b>                                                | 28  | Report authors conflicts of interest according to journal or International Committee of Medical Journal Editors requirements.                                            | Line 397                        |

From: Husereau D, Drummond M, Augustovski F, et al. Consolidated Health Economic Evaluation Reporting Standards 2022 (CHEERS 2022) Explanation and Elaboration: A Report of the ISPOR CHEERS II Good Practices Task Force. Value Health 2022;25.

[doi:10.1016/j.jval.2021.10.008](https://doi.org/10.1016/j.jval.2021.10.008)

Table S1: Resources by intervention components

| Item          | Description                                                                  | Approach to valuation                                                                                                                                                                                                                                                              |
|---------------|------------------------------------------------------------------------------|------------------------------------------------------------------------------------------------------------------------------------------------------------------------------------------------------------------------------------------------------------------------------------|
| Labour time   | Labour time incurred during intervention                                     | Staff time was recorded in minutes and job title was recorded in trial management logs and cost-capture templates. Labour time was valued using Fair Work Australia Award Wages or University of Newcastle Academic Staff and Teachers or Professional Staff enterprise agreement* |
| Materials     | Material items used during intervention. For example, participant workbooks. | Purchase receipts and trial management logs were used to value material items.                                                                                                                                                                                                     |
| Miscellaneous | Miscellaneous included telehealth delivery platform and website costs        | Purchase receipts and trial management logs were used to value all items.                                                                                                                                                                                                          |

\*Labour time was costed at 1.3 to account for additional overhead costs (on-costs) associated with employment. Labour for the telehealth session was costed at University of Newcastle Hew 5 Step 3 (2021) for a professional with an undergraduate degree. Telehealth session labour costs were \$40.19 per hour. Telehealth session costs which include some fixed costs (e.g., Vsee telehealth platform) total = \$6,952,28 for 38 participants = \$82.95 p/p. Min = \$8.46 (participants who attended no telehealth sessions), max \$209.39 (participants who attended 5 telehealth sessions).

Table S2: Resources by intervention components

| Intervention component   | Component details                                                                                                                                                      | Resource use details                                                                                                                                                                                                                          |
|--------------------------|------------------------------------------------------------------------------------------------------------------------------------------------------------------------|-----------------------------------------------------------------------------------------------------------------------------------------------------------------------------------------------------------------------------------------------|
| Telehealth sessions      | Interventionist (Dietitian)<br>Booking telehealth session<br>Trainer for telehealth session<br>Trainees for telehealth session<br>Facilitator manuals<br>VSee platform | Accredited Practicing dietitian consultation time and administration time (as per protocol)<br>Research team member time<br>Professor level academic trainer time<br>Registered dietitian time<br>Printing costs<br>Platform subscription fee |
| Participant Resources    | Online social support group component (Facebook)<br>live Q&A session on Facebook<br>Workbook printing<br>Postage<br>Website<br>Website domain name                     | Research team member time<br>Research team member time<br>Printing costs<br>Pre-paid postage envelopes<br>Website hosting fees<br>Domain name fee                                                                                             |
| Other intervention costs | Feedback reports<br>Questionnaire/tool costs (part of intervention)                                                                                                    | Registered dietitian time<br>Licensing of published tool                                                                                                                                                                                      |
